# Supplementary material for: Evaluating the national system for rare diseases in China from the point of drug access: progress and challenges
Source: Orphanet J Rare Dis. 2022 Sep 10;17:352. doi: 10.1186/s13023-022-02507-2 (PMC9463840; doi:10.1186/s13023-022-02507-2)
Supplement: Supplementary file 7 — Additional file 7: Table S7. The daily disposable income per capita of urban or rural residents from 2017 to 2020 in China. [file 13023_2022_2507_MOESM7_ESM.xls]

## Sheet: Additional file 7
Additional file 7: Table S7 The daily disposable income per capita of urban or rural residents from 2017 to 2020 in China.
	Disposable income per capita# (USD)
Years	Urban residents	Rural residens
2017	14.66	5.41
2018	15.81	5.89
2019	17.07	6.45
2020	17.66	6.9
# : Data extracted from the China Statistical Yearbook from 2017 to 2020.
