# Supplementary material for: Evaluating the national system for rare diseases in China from the point of drug access: progress and challenges
Source: Orphanet J Rare Dis. 2022 Sep 10;17:352. doi: 10.1186/s13023-022-02507-2 (PMC9463840; doi:10.1186/s13023-022-02507-2)
Supplement: Supplementary file 14 — Additional file 14: Table S14. The cost of DDD (DDDc) for surveyed orphan drugs from 2017 to 2020 in China (USD). [file 13023_2022_2507_MOESM14_ESM.xls]

## Sheet: Additional file 14
Additional file 14: Table S14 The cost of DDD (DDDc) for surveyed orphan drugs from 2017 to 2020 in China (USD).
NO.	Generic name	Indication	Imported/Domestic	Dosage form	DDDca（USD）
					2017				2018					2019					2020
					Nb	E	M	W		N	E	M	W		N	E	M	W		N	E	M	W
1	Edaravone	Amyotrophic lateral sclerosis	Domestic	Injection	6.53	20.32	5.65	6.47		6.47	6.63	6.62	6.18		5.99	6.47	7.06	5.81		6.47	15.99	5.65	6.14
2	Riluzole	Amyotrophic lateral sclerosis	Imported/Domesticd	Tablets	20.05	-c	16.15	20.05		20.05	7.35	20.05	21.32		7.48	7.35	13.7	7.61		7.35	7.08	7.35	13.83
3	Amantadine Hydrochloride	Parkinson Disease (Young-onset , Early-onset)	Domestic	Tablets	0.02	0.04	0.02	0.02		0.03	0.04	0.02	0.04		0.03	0.05	0.02	0.03		0.04	0.06	0.02	0.04
4	Apomorphine Hcl	Parkinson Disease (Young-onset , Early-onset)	Domestic	Tablets	53.31	-	53.31	-		53.31	-	53.31	-		-	-	-	-		-	-	-	-
5	Droxidopa	Multiple System Atrophy	Domestic	Capsules	12.35	-	12.44	12.26		11.98	-	12.44	11.51		11.98	-	12.44	11.51		11.98	-	12.44	11.51
6	Droxidopa	Parkinson Disease (Young-onset , Early-onset)	Domestic	Capsules	12.35	-	12.44	12.26		11.98	-	12.44	11.51		11.98	-	12.44	11.51		11.98	-	12.44	11.51
7	Levodopa And Carbidopa	Parkinson Disease (Young-onset , Early-onset)	Imported	Tablets	0.27	0.28	-	0.21		0.26	0.27	-	0.21		0.26	0.27	0.24	0.2		0.26	0.27	0.24	0.19
	(Sinemet)
8	Levodopa And Carbidopa	Parkinson Disease (Young-onset , Early-onset)	Imported	Tablets	1.91	-	1.91	-		1.54	-	1.54	-		1.54	-	1.54	-		1.16	1.13	1.5	1.18
	(Stalevo)
9	Selegiline Hcl	Parkinson Disease (Young-onset , Early-onset)	Imported	Tablets	1.03	1	0.98	1.04		0.99	0.99	0.99	1.03		0.99	0.99	0.99	1.01		0.98	0.96	0.97	1.01
10	Ropinirole	Parkinson Disease (Young-onset , Early-onset)	Domestic	Tablets	1.8	-	-	1.8		1.8	-	-	1.8		1.8	1.8	-	1.8		1.8	1.8	-	1.8
11	Pramipexole	Parkinson Disease (Young-onset , Early-onset)	Imported	Tablets	9.07	9.07	8.2	9.07		8.5	8.16	8.16	9.07		8.16	8.16	8.16	8.7		8.09	7.83	7.9	8.7
12	Rasagiline	Parkinson Disease (Young-onset , Early-onset)	Imported	Tablets	-	-	-	-		6.43	-	6.43	-		6.67	6.67	6.67	-		6.2	6.2	6.08	6.2
13	Siponimod	Multiple Sclerosis	Imported	Tablets	-	-	-	-		-	-	-	-		-	-	-	-		35.59	-	35.59	-
14	Idebenone	Progressive muscular dystrophy	Domestic	Tablets	12.87	15.92	7.05	12.87		12.71	12.46	7.26	12.71		12.18	12.01	12.71	12.46		12.21	11.69	12.73	12.46
15	Idebenone	Leber's hereditary optic neuropathy	Domestic	Tablets	17.16	21.23	9.4	17.16		16.94	16.61	9.68	16.94		16.24	16.01	16.94	16.61		16.28	15.58	16.97	16.61
16	Pyridostigmine Bromide	Generalized Myasthenia Gravis	Domestic	Tablets	0.41	0.43	0.39	0.44		0.52	0.47	0.51	0.54		0.62	0.6	0.6	0.69		0.61	0.6	0.63	0.69
17	Neostigmine	Generalized Myasthenia Gravis	Domestic	Injection	0.81	0.81	0.76	0.8		0.8	0.8	0.75	0.79		0.87	1.02	0.76	0.93		2.51	2.71	8.6	1.32
18	Baclofen	Hereditary spastic paraplegia	Imported/Domestic	Tablets	2.44	1.16	3.02	2.51		1.47	1.11	1.98	1.99		1.43	1.11	1.86	1.97		1.43	1.26	2.23	1.97
19	Baclofen	Multiple Sclerosis	Imported/Domestic	Tablets	2.44	1.16	3.02	2.51		1.47	1.11	1.98	1.99		1.43	1.11	1.86	1.97		1.43	1.26	2.23	1.97
20	Teriflunomide	Multiple Sclerosis	Imported	Tablets	-	-	-	-		-	-	-	-		30.95	30.95	-	-		20.74	20.74	20.74	20.74
21	Fingolimod Hydrochloride	Multiple Sclerosis	Imported	Capsules	-	-	-	-		-	-	-	-		-	-	-	-		44.34	-	44.34	-
22	Nusinersen	Spinal Muscular Atrophy	Imported	Injection	-	-	-	-		-	-	-	-		-	-	-	-		857.48	857.48	857.48	-
23	Tizanidine	Multiple Sclerosis	Domestic	Tablets	3.53	3.23	3.57	3.52		3.44	2.84	3.52	3.52		3.44	2.84	3.6	3.23		3.59	2.84	3.6	3.45
24	Tizanidine	Amyotrophic Lateral Sclerosis	Domestic	Tablets	3.53	3.23	3.57	3.52		3.44	2.84	3.52	3.52		3.44	2.84	3.6	3.23		3.59	2.84	3.6	3.45
25	Antihemophilic Factor Ⅷ a	Hemophilia	Imported/Domestic	Injection	942.94	509.56	1007.79	1007.37		1024.26	1050	1007.79	942.94		983.6	1025.82	1005.86	942.94		1024.26	1024.26	1070.72	942.94
26	Coagulation Factor IX a	Hemophilia	Imported	Injection	-	-	-	-		2177.33	2238.72	2156.88	2173.69		2124.21	2018.02	2140.53	2124.23		2124.21	2071.1	2140.53	2124.23
27	Coagulation Factor Viia	Hemophilia	Imported	Injection	5696.3	5549.89	5699.07	5693.53		5355	5355	5355	5355		5355	5355	5355	5355		5095.59	5095.59	5095.59	5095.59
28	Human Prothrombin Complex a	Hemophilia	Domestic	Injection	249.36	249.63	240.63	249.63		249.63	249.63	248.23	249.63		249.63	249.63	263.93	249.63		248.26	249.55	244.49	249.63
29	Tranexamic Acid (Tranexamic Acid And Sodium Chloride Injection)	Hemophilia	Domestic	Injection	0.01	0.01	0.01	0.01		0.01	0.01	0.01	0.01		0.01	0.01	0.01	0.01		0.01	0.01	0.01	0.01
30	Tranexamic Acid (Tranexamic Acid Injection)	Hemophilia	Domestic	Injection	0	0	-	0		0	0	0	0		0	0	0.01	0		0	0	0.01	0
31	Tranexamic Acid (Tranexamic Acid Tablets)	Hemophilia	Domestic	Tablets	2.38	12.87	2.38	2.2		2.38	14.12	2.38	2.2		2.38	12.85	2.38	2.2		2.38	12.85	-	2.38
32	Danazol	Hereditary Angioedema (HAE)	Domestic	Capsules	0.59	-	0.58	0.59		0.62	0.62	0.58	58.82		0.59	0.62	0.58	-		0.59	0.59	0.58	-
33	Treprostinil	Idiopathic pulmonary arterial hypertension	Domestic	Injection	-	-	-	-		-	-	-	-		-	-	-	-		2.89	2.89	-	2.89
34	Selexipag	Idiopathic pulmonary arterial hypertension	Imported	Tablets	-	-	-	-		-	-	-	-		68.07	-	68.07	-		129.41	129.41	90.59	129.41
35	Tadalafil	Idiopathic pulmonary arterial hypertension	Imported/Domestic	Tablets	32.39	30.46	29.37	32.94		29.51	29.51	29.37	31.48		29.38	29.44	29.44	29.24		26.53	27.21	19.91	28.55
36	Ambrisentan	Idiopathic pulmonary arterial hypertension	Imported/Domestic	Tablets	9.71	-	-	9.71		22.4	-	-	22.4		27.94	-	27.94	22.4		6.74	5.88	6.74	7.05
37	Iloprost Inhalation Solution	Idiopathic pulmonary arterial hypertension	Imported	Inhalation	-	-	-	-		-	-	-	-		105.5	105.5	-	-		105.5	105.5	-	-
38	Sildenafil Citrate	Idiopathic pulmonary arterial hypertension	Imported/Domestic	Tablets	8.27	9.07	7.38	7.68		7.46	8.37	7.31	7.46		7.27	8.88	7.25	7.29		7.25	8.29	7.24	7.26
39	Riociguat	Idiopathic pulmonary arterial hypertension	Imported	Tablets	-	-	-	-		-	-	-	-		-	-	-	-		27.13	27.13	27.13	27.13
40	Macitentan	Idiopathic pulmonary arterial hypertension	Imported	Tablets	-	-	-	-		146.96	-	-	146.96		146.96	-	-	146.96		20.29	20.29	20.29	20.29
41	Bosentan Hydrate	Idiopathic pulmonary arterial hypertension	Imported	Tablets	20.59	20.44	-	20.59		19.94	19.94	-	18.09		15.59	19.94	15.07	15.59		15.59	15.74	15.07	15.59
42	Evolocumab	Homozygous familial hypercholesterolaemia	Imported	Injection	-	-	-	-		-	-	-	-		19.09	19.09	19.09	19.09		19.09	19.09	19.09	19.09
43	Rosuvastatin	Homozygous familial hypercholesterolaemia	Imported/Domestic	Tablets	2.13	2.06	2.16	2.29		2.07	2.05	2.06	2.2		1.88	1.82	1.98	1.71		1.63	1.63	1.63	1.63
44	Simvastatin	Homozygous familial hypercholesterolaemia	Imported/Domestic	Tablets	0.74	0.74	0.42	0.77		0.77	0.74	0.74	0.82		0.74	0.74	0.74	0.74		0.25	0.05	0.63	0.25
45	Atorvastatin	Homozygous familial hypercholesterolaemia	Imported/Domestic	Tablets	2.62	2.52	2.62	2.94		2.62	2.03	2.61	2.93		2.39	2.18	2.32	2.67		2.03	2.02	2.03	2.03
46	Atorvastatin	Homozygous familial hypercholesterolaemia	Domestic	Capsules	2.47	-	-	2.47		2.44	-	-	2.44		2.34	-	2.23	2.44		0.07	0.07	-	-
47	Ezetimibe	Homozygous familial hypercholesterolaemia	Imported	Tablets	1.14	1.24	1.14	1.11		1.04	1.04	1.04	1.07		1.04	1.04	1.04	1.04		1.04	1.04	1.04	1.04
48	Ezetimibe	Sitosterolemia	Imported	Tablets	1.14	1.24	1.14	1.11		1.04	1.04	1.04	1.07		1.04	1.04	1.04	1.04		1.04	1.04	1.04	1.04
49	Alirocumab	Homozygous familial hypercholesterolaemia	Imported	Injection	-	-	-	-		-	-	-	-		-	-	-	-		39.61	39.61	-	-
50	Ivabradine	Idiopathic Cardiomyopathy	Imported	Tablets	1.27	1.27	1.36	1.27		1.27	1.27	1.36	1.27		1.27	1.27	1.37	1.27		1.27	1.26	1.27	1.27
51	Mexiletine Hydrochloride	Congenital Myotonia Syndrome (Non-Dystrophic Myotonia, NDM)	Domestic	Tablets	0.1	0.09	0.13	0.1		0.15	0.16	0.1	0.15		0.15	0.18	0.15	0.1		0.15	0.15	0.15	0.17
52	Immune Globulin Infusion (Human)	Multifocal motor neuropathy	Domestic	Injection	0.12	0.12	0.11	0.12		0.12	0.12	0.11	0.12		0.12	0.12	0.12	0.12		0.12	0.12	0.12	0.12
53	Nintedanib	Idiopathic Pulmonary Fibrosis	Imported	Capsules	-	-	-	-		-	-	-	-		109.8	-	-	109.8		69.22	-	69.22	-
54	Nintedanib	Systemic Sclerosis	Imported	Capsules	-	-	-	-		-	-	-	-		109.8	-	-	109.8		69.22	-	69.22	-
55	Pirfenidone	Idiopathic Pulmonary Fibrosis	Domestic	Capsules	36.26	36.26	36.26	-		36.26	36.26	36.26	36.26		36.26	36.26	36.26	36.26		36.26	36.23	36.26	36.26
56	Pirfenidone	Idiopathic Pulmonary Fibrosis	Domestic	Tablets	-	-	-	-		-	-	-	-		-	-	-	-		28.57	-	28.57	-
57	Everolimus	Lymphangioleiomyomatosis(LAM)	Imported	Tablets	40.21	-	42.19	38.24		42.22	42.55	42.78	38.24		42.22	42.22	42.22	38.24		38.24	38.24	37.87	38.24
58	Everolimus	Tuberous sclerosis complex	Imported	Tablets	34.18	-	35.86	32.5		35.89	36.17	36.36	32.5		35.89	35.89	35.89	32.5		32.5	32.5	32.19	32.5
59	Sirolimus	Lymphangioleiomyomatosis	Imported	Tablets	12.61	12.38	12.61	12.61		12.43	12.2	12.61	12.37		12.09	11.98	14.5	12.08		11.97	11.78	13.16	12.08
60	Sirolimus	Lymphangioleiomyomatosis	Domestic	Oral Solution	6.11	6.46	6.11	-		6.11	6.46	6.11	-		6.11	6.11	6.27	-		6.11	6.11	6.27	-
61	Sirolimus	Lymphangioleiomyomatosis	Domestic	Capsules	12.68	-	-	12.68		11.55	-	-	11.55		11.01	-	-	11.01		11.01	-	11.01	11.01
62	Tocilizumab	Systemic Sclerosis	Imported	Injection	81.88	81.88	81.88	81.88		81.88	81.88	81.88	81.88		41.06	39.14	38.18	41.37		35.31	35.31	35.31	35.31
63	Tocilizumab	Castleman disease	Imported	Injection	141.54	141.54	141.54	141.54		141.54	141.54	141.54	141.54		70.98	67.67	66	71.52		61.03	61.03	61.03	61.03
64	Cyclophosphamide Hydrate	Fanconi anemia	Imported	Injection	2.67	2.9	0.31	2.67		2.75	2.78	2.81	2.7		2.67	2.67	2.67	2.67		2.67	2.67	2.66	2.67
65	Cyclophosphamide Hydrate	Generalized Myasthenia Gravis	Imported	Injection	10.68	11.58	1.24	10.68		11	11.11	11.24	10.8		10.68	10.68	10.66	10.68		10.68	10.68	10.64	10.68
66	Tacrolimus Hydrate	Generalized myasthenia gravis	Imported/Domestic	Capsules	11.15	10.03	10.2	11.81		10.29	10.03	10.16	11.15		10.24	10.03	10.18	11.15		10.18	10.01	10.16	10.66
67	Interferon Beta-1b (Recombinant）	Multiple Sclerosis	Imported	Injection	22.72	22.72	-	-		22.72	22.72	-	-		22.72	22.72	-	-		22.72	22.72	-	-
68	Mitoxantrone	Multiple Sclerosis	Domestic	Injection	0.28	0.33	0.28	0.24		0.26	0.22	0.3	0.26		0.23	0.22	0.24	0.23		0.2	0.2	-	-
69	Vemurafenib	Erdheim-Chester	Imported	Tablets	131.81	131.86	-	131.76		131.76	131.81	-	131.76		131.77	131.82	131.77	131.81		131.77	131.76	118.65	131.86
70	Filgrastim	Severe Congenital Neutropenia	Domestic	Injection	-	-	-	-		-	-	-	-		63.41	-	63.41	-		63.41	63.41	63.41	63.41
71	Hydroxycarbamide	Sickle-cell disease	Domestic	Tablets	0.23	0.23	0.23	0.23		0.23	0.23	0.23	0.23		0.23	0.22	0.23	0.23		0.23	0.23	0.23	0.23
72	Colchicine	Familial Mediterranean fever (FMF)	Domestic	Tablets	0.13	0.15	0.12	0.13		0.13	0.13	0.12	0.13		0.12	0.13	0.12	0.12		0.11	0.13	0.11	0.12
73	L-Glutamine (Marzulene-S )	Sickle cell disease	Imported	granule	7.41	7.22	7.4	7.72		7.42	7.05	7.36	7.78		7.41	7.44	7.08	7.57		7.36	7.5	6.18	7.57
74	L-Glutamine (Glutamine And Guaiazulene Sulfonate Sodium Grannules )	Sickle cell disease	Domestic	granule	-	-	-	-		4.32	4.32	-	-		4.32	4.32	-	-		4.32	4.32	-	-
75	Levocarnitine (Levocarnitine For Injection)	Primary carnitine deficiency	Imported/Domestic	Injection	16.73	15.18	15.44	18.51		15.81	15.18	15.44	17.1		16.69	16.86	18.74	16.69		16.32	15.18	21.98	16.69
76	Levocarnitine (Levocarnitine Oral Solution)	Primary carnitine deficiency	Imported/Domestic	Oral solution	5.03	4.71	5.35	6.04		4.71	4.71	5.12	5.38		4.71	4.71	5.12	4.72		4.71	4.71	5.12	4.72
77	Miglustat	Gaucher's Disease	Imported	Capsules	-	-	-	-		-	-	-	-		-	-	-	-		56.47	56.47	-	-
78	Miglustat	Niemann-Pick Disease	Imported	Capsules	-	-	-	-		-	-	-	-		-	-	-	-		112.94	112.94	-	-
79	Miglustat	Fabry Disease	Imported	Capsules	-	-	-	-		-	-	-	-		-	-	-	-		37.65	37.65	-	-
80	Alglucosidase Alfa	Glycogen Storage Disease	Imported	Injection	-	-	-	-		-	-	-	-		1464.71	-	1464.71	-		1464.71	-	1464.71	-
81	Imiglucerase a	Gaucher's Disease	Imported	Injection	-	-	-	-		-	-	-	-		-	-	-	-		2205.79	-	-	2205.79
82	Follitropin Alfa, Recombinant a	Idiopathic hypogonadotropic hypogonadism	Imported/Domestic	Injection	57.32	57.08	31.48	60.67		56.42	56.3	53.9	58.4		55.37	55.4	52.76	59.44		55.37	55.37	51.95	54.12
83	Sapropterin Hydrochloride	Hyperphenylalaninemia	Imported	Tablets	-	-	-	-		-	-	-	-		302.48	302.48	-	-		302.48	302.48	-	-
84	Sapropterin Hydrochloride	Phenylketonuria	Imported	Tablets	-	-	-	-		-	-	-	-		302.48	302.48	-	-		302.48	302.48	-	-
85	Sapropterin Hydrochloride	Tetrahydrobiopterin Deficiency	Imported	Tablets	-	-	-	-		-	-	-	-		302.48	302.48	-	-		302.48	302.48	-	-
86	Ceramide Trihexosidase/Alpha-Galactosidase A	Fabry Disease	Imported	Injection	-	-	-	-		-	-	-	-		-	-	-	-		2519.71	2519.71	-	-
87	Desmopressin Acetate	Hemophilia	Domestic	Injection	24.35	22.92	19.2	33.18		23.65	22.46	18.98	33.18		23.65	22.41	32.7	16.77		21.26	21.26	17.21	-
88	Desmopressin Acetate	Hemophilia	Domestic	Tablets	0.88	0.88	-	0.87		0.86	0.84	-	0.87		0.87	-	-	0.87		0.85	0.83	-	0.87
89	Hydrocortisone	Congenital Adrenal Hypoplasia	Domestic	Tablets	0.06	0.09	0.09	0.05		0.08	0.08	0.14	0.07		0.11	0.12	0.14	0.08		0.14	0.13	0.14	0.13
90	Hydrocortisone	21-Hydroxyulase Deficiency	Domestic	Tablets	0.06	0.09	0.09	0.05		0.08	0.09	0.15	0.07		0.11	0.13	0.15	0.08		0.15	0.14	0.15	0.14
91	Hydrocortisone	21-Hydroxyulase Deficiency	Domestic	Injection	0.1	0.16	0.4	0.06		0.08	0.11	0.4	0.06		0.1	0.11	0.39	0.06		0.08	0.08	0.17	0.06
92	Hydrocortisone	Generalized Myasthenia Gravis	Domestic	Injection	0.08	0.13	0.33	0.05		0.07	0.09	0.33	0.05		0.08	0.09	0.32	0.05		0.07	0.07	0.14	0.05
93	Somatropin	Noonan Syndrome	Imported/Domestic	Injection	8.49	11.82	8.58	6.87		7.57	7.62	7.64	7.42		6.95	6.76	7.12	7.99		6.94	6.94	6.62	7.99
94	Somatropin	Prader-Willi Syndrome	Imported/Domestic	Injection	4.5	6.27	4.55	3.64		4.01	4.04	4.05	3.93		3.69	3.59	3.77	4.24		3.68	3.68	3.51	4.24
95	Penicillamine	Hepatolenticular Degeneration (Wilson Disease)	Domestic	Tablets	0.8	0.8	0.77	0.79		0.77	0.79	0.77	0.77		0.77	0.8	0.77	0.77		0.77	0.78	0.77	0.77
96	Dimercaptosuccininic Acid	Hepatolenticular Degeneration (Wilson Disease)	Domestic	Capsules	2.1	2.1	-	-		2	2	-	-		2.43	2.43	-	-		2.57	2.57	-	-
97	Zinc Suisate	Hepatolenticular Degeneration (Wilson Disease)	Domestic	Oral solution	-	-	-	-		-	-	-	-		10.77	-	-	10.77		10.77	-	-	10.77
98	Cholic Acid	Inborn errors of bile acid synthesis	Imported	Capsules	5.28	5.23	5.25	5.5		5.27	5.24	5.25	5.4		5.25	5.25	5.25	5.29		5.25	5.25	5.25	5.25
99	Sodium Cholate	Inborn Errors of Bile Acid Synthesis	Domestic	Tablets	0.07	-	0.07	-		0.07	-	0.07	-		0.09	-	0.09	-		0.07	-	0.07	-
a: DDDc: The cost of the daily defined dose (DDDc)
b: N: nationwide. E: eastern areas. M: middle areas. W: western areas.
c: "-" indicates that the drug did not appear in the questionnaire in that year in the rigion and is considered unavailable.
d: "Imported/Domestic" indicates that the drug had both imported and domestic forms.
