# Supplementary material for: Evaluating the national system for rare diseases in China from the point of drug access: progress and challenges
Source: Orphanet J Rare Dis. 2022 Sep 10;17:352. doi: 10.1186/s13023-022-02507-2 (PMC9463840; doi:10.1186/s13023-022-02507-2)
Supplement: Supplementary file 15 — Additional file 15: Table S15. The affordability for surveyed orphan drugs from 2018 to 2020 in China. [file 13023_2022_2507_MOESM15_ESM.xls]

## Sheet: Additional file 15
Additional file 15: Table S15 The affordability for surveyed orphan drugs from 2018 to 2020 in China (USD).
NO	Generic name	Indication	Dosage form	2018				2019				2020
				Affordability		Affordability (if 5% OOP)		Affordability		Affordability (if 5% OOP)		Affordability		Affordability (if 5% OOP)
				U	R	U	R	U	R	U	R	U	R	U	R
1	Edaravone	Amyotrophic lateral sclerosis	Injection	Y	N	Y	N	Y	Y	Y	Y	Y	Y	Y	Y
2	Riluzole	Amyotrophic lateral sclerosis	Tablets	N	N	Y	Y	Y	N	Y	Y	Y	N	Y	Y
3	Amantadine Hydrochloride	Parkinson Disease (Young-onset , Early-onset)	Tablets	Y	Y	Y	Y	Y	Y	Y	Y	Y	Y	Y	Y
4	Apomorphine Hcl	Parkinson Disease (Young-onset , Early-onset)	Tablets	N	N	Y	Y	-a	-	-	-	-	-	-	-
5	Droxidopa	Multiple System Atrophy	Capsules	Y	N	Y	Y	Y	N	Y	Y	Y	N	Y	Y
6	Droxidopa	Parkinson Disease (Young-onset , Early-onset)	Capsules	Y	N	Y	Y	Y	N	Y	Y	Y	N	Y	Y
7	Levodopa And Carbidopa	Parkinson Disease (Young-onset , Early-onset)	Tablets	Y	Y	Y	Y	Y	Y	Y	Y	Y	Y	Y	Y
	(Sinemet)
8	Levodopa And Carbidopa	Parkinson Disease (Young-onset , Early-onset)	Tablets	Y	Y	Y	Y	Y	Y	Y	Y	Y	Y	Y	Y
	(Stalevo)
9	Selegiline Hcl	Parkinson Disease (Young-onset , Early-onset)	Tablets	Y	Y	Y	Y	Y	Y	Y	Y	Y	Y	Y	Y
10	Ropinirole	Parkinson Disease (Young-onset , Early-onset)	Tablets	Y	Y	Y	Y	Y	Y	Y	Y	Y	Y	Y	Y
11	Pramipexole	Parkinson Disease (Young-onset , Early-onset)	Tablets	Y	N	Y	Y	Y	N	Y	Y	Y	N	Y	Y
12	Rasagiline	Parkinson Disease (Young-onset , Early-onset)	Tablets	Y	N	Y	N	Y	N	Y	N	Y	Y	Y	Y
13	Siponimod	Multiple Sclerosis	Tablets	-	-	-	-	-	-	-	-	N	N	N	N
14	Idebenone	Progressive muscular dystrophy	Tablets	Y	N	Y	N	Y	N	Y	N	Y	N	Y	N
15	Idebenone	Leber's hereditary optic neuropathy	Tablets	N	N	N	N	Y	N	Y	N	Y	N	Y	N
16	Pyridostigmine Bromide	Generalized Myasthenia Gravis	Tablets	Y	Y	Y	Y	Y	Y	Y	Y	Y	Y	Y	Y
17	Neostigmine	Generalized Myasthenia Gravis	Injection	Y	Y	Y	Y	Y	Y	Y	Y	Y	Y	Y	Y
18	Baclofen	Hereditary spastic paraplegia	Tablets	Y	Y	Y	Y	Y	Y	Y	Y	Y	Y	Y	Y
19	Baclofen	Multiple Sclerosis	Tablets	Y	Y	Y	Y	Y	Y	Y	Y	Y	Y	Y	Y
20	Teriflunomide	Multiple Sclerosis	Tablets	-	-	-	-	N	N	N	N	N	N	Y	Y
21	Fingolimod Hydrochloride	Multiple Sclerosis	Capsules	-	-	-	-	-	-	-	-	N	N	N	N
22	Nusinersen	Spinal Muscular Atrophy	Injection	-	-	-	-	-	-	-	-	N	N	N	N
23	Tizanidine	Multiple Sclerosis	Tablets	Y	Y	Y	Y	Y	Y	Y	Y	Y	Y	Y	Y
24	Tizanidine	Amyotrophic Lateral Sclerosis	Tablets	Y	Y	Y	Y	Y	Y	Y	Y	Y	Y	Y	Y
25	Antihemophilic Factor Ⅷ a	Hemophilia	Injection	N	N	N	N	N	N	N	N	N	N	N	N
26	Coagulation Factor IX a	Hemophilia	Injection	N	N	N	N	N	N	N	N	N	N	N	N
27	Coagulation Factor Viia	Hemophilia	Injection	N	N	N	N	N	N	N	N	N	N	N	N
28	Human Prothrombin Complex a	Hemophilia	Injection	N	N	Y	N	N	N	Y	N	N	N	Y	N
29	Tranexamic Acid (Tranexamic Acid and Sodium Chloride Injection)	Hemophilia	Injection	Y	Y	Y	Y	Y	Y	Y	Y	Y	Y	Y	Y
30	Tranexamic Acid (Tranexamic Acid Injection)	Hemophilia	Injection	Y	Y	Y	Y	Y	Y	Y	Y	Y	Y	Y	Y
31	Tranexamic Acid (Tranexamic Acid Tablets)	Hemophilia	Tablets	Y	Y	Y	Y	Y	Y	Y	Y	Y	Y	Y	Y
32	Danazol	Hereditary Angioedema (HAE)	Capsules	Y	Y	Y	Y	Y	Y	Y	Y	Y	Y	Y	Y
33	Treprostinil	Idiopathic pulmonary arterial hypertension	Injection	-	-	-	-	-	-	-	-	Y	Y	Y	Y
34	Selexipag	Idiopathic pulmonary arterial hypertension	Tablets	-	-	-	-	N	N	N	N	N	N	Y	Y
35	Tadalafil	Idiopathic pulmonary arterial hypertension	Tablets	N	N	N	N	N	N	N	N	N	N	N	N
36	Ambrisentan	Idiopathic pulmonary arterial hypertension	Tablets	N	N	N	N	N	N	N	N	Y	Y	Y	Y
37	Iloprost Inhalation Solution	Idiopathic pulmonary arterial hypertension	Inhalation	-	-	-	-	N	N	N	N	N	N	N	N
38	Sildenafil Citrate	Idiopathic pulmonary arterial hypertension	Tablets	Y	N	Y	N	Y	N	Y	N	Y	N	Y	N
39	Riociguat	Idiopathic pulmonary arterial hypertension	Tablets	-	-	-	-	-	-	-	-	N	N	Y	Y
40	Macitentan	Idiopathic pulmonary arterial hypertension	Tablets	N	N	N	N	N	N	N	N	N	N	Y	Y
41	Bosentan Hydrate	Idiopathic pulmonary arterial hypertension	Tablets	N	N	N	N	Y	N	Y	N	Y	N	Y	Y
42	Evolocumab	Homozygous familial hypercholesterolaemia	Injection	-	-	-	-	N	N	N	N	N	N	N	N
43	Rosuvastatin	Homozygous familial hypercholesterolaemia	Tablets	Y	Y	Y	Y	Y	Y	Y	Y	Y	Y	Y	Y
44	Simvastatin	Homozygous familial hypercholesterolaemia	Tablets	Y	Y	Y	Y	Y	Y	Y	Y	Y	Y	Y	Y
45	Atorvastatin	Homozygous familial hypercholesterolaemia	Tablets	Y	Y	Y	Y	Y	Y	Y	Y	Y	Y	Y	Y
46	Atorvastatin	Homozygous familial hypercholesterolaemia	Capsules	Y	Y	Y	Y	Y	Y	Y	Y	Y	Y	Y	Y
47	Ezetimibe	Homozygous familial hypercholesterolaemia	Tablets	Y	Y	Y	Y	Y	Y	Y	Y	Y	Y	Y	Y
48	Ezetimibe	Sitosterolemia	Tablets	Y	Y	Y	Y	Y	Y	Y	Y	Y	Y	Y	Y
49	Alirocumab	Homozygous familial hypercholesterolaemia	Injection	-	-	-	-	-	-	-	-	N	N	N	N
50	Ivabradine	Idiopathic Cardiomyopathy	Tablets	Y	Y	Y	Y	Y	Y	Y	Y	Y	Y	Y	Y
51	Mexiletine Hydrochloride	Congenital Myotonia Syndrome (Non-Dystrophic Myotonia, NDM)	Tablets	Y	Y	Y	Y	Y	Y	Y	Y	Y	Y	Y	Y
52	Immune Globulin Infusion (Human)	Multifocal motor neuropathy	Injection	Y	Y	Y	Y	Y	Y	Y	Y	Y	Y	Y	Y
53	Nintedanib	Idiopathic Pulmonary Fibrosis	Capsules	-	-	-	-	N	N	N	N	N	N	N	N
54	Nintedanib	Systemic Sclerosis	Capsules	-	-	-	-	N	N	N	N	N	N	N	N
55	Pirfenidone	Idiopathic Pulmonary Fibrosis	Capsules	N	N	Y	Y	N	N	Y	Y	N	N	Y	Y
56	Pirfenidone	Idiopathic Pulmonary Fibrosis	Tablets	-	-	-	-	-	-	-	-	N	N	Y	Y
57	Everolimus	Lymphangioleiomyomatosis(LAM)	Tablets	N	N	N	N	N	N	Y	Y	N	N	Y	Y
58	Everolimus	Tuberous sclerosis complex	Tablets	N	N	N	N	N	N	Y	Y	N	N	Y	Y
59	Sirolimus	Lymphangioleiomyomatosis	Tablets	Y	N	Y	N	Y	N	Y	N	Y	N	Y	N
60	Sirolimus	Lymphangioleiomyomatosis	Oral Solution	Y	N	Y	N	Y	Y	Y	Y	Y	Y	Y	Y
61	Sirolimus	Lymphangioleiomyomatosis	Capsules	Y	N	Y	N	Y	N	Y	N	Y	N	Y	N
62	Tocilizumab	Systemic Sclerosis	Injection	N	N	N	N	N	N	N	N	N	N	N	N
63	Tocilizumab	Castleman disease	Injection	N	N	N	N	N	N	N	N	N	N	N	N
64	Cyclophosphamide Hydrate	Fanconi anemia	Injection	Y	Y	Y	Y	Y	Y	Y	Y	Y	Y	Y	Y
65	Cyclophosphamide Hydrate	Generalized Myasthenia Gravis	Injection	Y	N	Y	Y	Y	N	Y	Y	Y	N	Y	Y
66	Tacrolimus Hydrate	Generalized myasthenia gravis	Capsules	Y	N	Y	Y	Y	N	Y	Y	Y	N	Y	Y
67	Interferon Beta-1b (Recombinant）	Multiple Sclerosis	Injection	N	N	Y	Y	N	N	Y	Y	N	N	N	N
68	Mitoxantrone	Multiple Sclerosis	Injection	Y	Y	Y	Y	Y	Y	Y	Y	Y	Y	Y	Y
69	Vemurafenib	Erdheim-Chester	Tablets	N	N	N	N	N	N	Y	N	N	N	Y	Y
70	Filgrastim	Severe Congenital Neutropenia	Injection	-	-	-	-	N	N	N	N	N	N	Y	Y
71	Hydroxycarbamide	Sickle-cell disease	Tablets	Y	Y	Y	Y	Y	Y	Y	Y	Y	Y	Y	Y
72	Colchicine	Familial Mediterranean fever (FMF)	Tablets	Y	Y	Y	Y	Y	Y	Y	Y	Y	Y	Y	Y
73	L-Glutamine (Marzulene-S )	Sickle cell disease	granule	Y	Y	Y	N	Y	N	Y	N	Y	N	Y	N
74	L-Glutamine (Glutamine And Guaiazulene Sulfonate Sodium Grannules )	Sickle cell disease	granule	Y	Y	Y	Y	Y	Y	Y	Y	Y	Y	Y	Y
75	Levocarnitine (Levocarnitine For Injection)	Primary carnitine deficiency	Injection	N	N	N	N	Y	N	Y	N	Y	N	Y	N
76	Levocarnitine (Levocarnitine Oral Solution)	Primary carnitine deficiency	Oral solution	Y	Y	Y	Y	Y	Y	Y	Y	Y	Y	Y	Y
77	Miglustat	Gaucher's Disease	Capsules	-	-	-	-	-	-	-	-	N	N	N	N
78	Miglustat	Niemann-Pick Disease	Capsules	-	-	-	-	-	-	-	-	N	N	Y	Y
79	Miglustat	Fabry Disease	Capsules	-	-	-	-	-	-	-	-	N	N	N	N
80	Alglucosidase Alfa	Glycogen Storage Disease	Injection	-	-	-	-	N	N	N	N	N	N	N	N
81	Imiglucerase a	Gaucher's Disease	Injection	-	-	-	-	-	-	-	-	N	N	N	N
82	Follitropin Alfa, Recombinant a	Idiopathic hypogonadotropic hypogonadism	Injection	N	N	N	N	N	N	N	N	N	N	N	N
83	Sapropterin Hydrochloride	Hyperphenylalaninemia	Tablets	-	-	-	-	N	N	N	N	N	N	N	N
84	Sapropterin Hydrochloride	Phenylketonuria	Tablets	-	-	-	-	N	N	N	N	N	N	N	N
85	Sapropterin Hydrochloride	Tetrahydrobiopterin Deficiency	Tablets	-	-	-	-	N	N	N	N	N	N	N	N
86	Ceramide Trihexosidase/Alpha-Galactosidase A	Fabry Disease	Injection	-	-	-	-	-	-	-	-	N	N	N	N
87	Desmopressin Acetate	Hemophilia	Injection	N	N	Y	Y	N	N	Y	Y	N	N	Y	Y
88	Desmopressin Acetate	Hemophilia	Tablets	Y	Y	Y	Y	Y	Y	Y	Y	Y	Y	Y	Y
89	Hydrocortisone	Congenital Adrenal Hypoplasia	Tablets	Y	Y	Y	Y	Y	Y	Y	Y	Y	Y	Y	Y
90	Hydrocortisone	21-Hydroxyulase Deficiency	Tablets	Y	Y	Y	Y	Y	Y	Y	Y	Y	Y	Y	Y
91	Hydrocortisone	21-Hydroxyulase Deficiency	Injection	Y	Y	Y	Y	Y	Y	Y	Y	Y	Y	Y	Y
92	Hydrocortisone	Generalized Myasthenia Gravis	Injection	Y	Y	Y	Y	Y	Y	Y	Y	Y	Y	Y	Y
93	Somatropin	Noonan Syndrome	Injection	Y	N	Y	N	Y	N	Y	N	Y	N	Y	N
94	Somatropin	Prader-Willi Syndrome	Injection	Y	Y	Y	Y	Y	Y	Y	Y	Y	Y	Y	Y
95	Penicillamine	Hepatolenticular Degeneration (Wilson Disease)	Tablets	Y	Y	Y	Y	Y	Y	Y	Y	Y	Y	Y	Y
96	Dimercaptosuccininic Acid	Hepatolenticular Degeneration (Wilson Disease)	Capsules	Y	Y	Y	Y	Y	Y	Y	Y	Y	Y	Y	Y
97	Zinc Suisate	Hepatolenticular Degeneration (Wilson Disease)	Oral solution	-	-	-	-	Y	N	Y	N	Y	N	Y	N
98	Cholic Acid	Inborn errors of bile acid synthesis	Capsules	Y	Y	Y	Y	Y	Y	Y	Y	Y	Y	Y	Y
99	Sodium Cholate	Inborn Errors of Bile Acid Synthesis	Tablets	Y	Y	Y	Y	Y	Y	Y	Y	Y	Y	Y	Y
U: for urban residents. R: for rural residents. Y=Yes N=No. Y: From affordable to unaffordable after NMBI. “NBMI”: National Basic Medical Insurance. “OOP”: out-of-pocket expenses.
a: -: The drug is unavailable in this year.
Note: “Affordable”: According to the WHO/HAI methodology of drug accessibility, the cost of daily dose (DDDc) is compared with the daily income of residents. DDDc is considered affordable if it is less than or equal to the daily per capita income, otherwise it is not affordable. 0% co-payment rate of Part A drugs and 5% co-payment rate of Part B drugs are used as the calculation standard.
